# Supplementary material for: CYP27A1 deficiency promoted osteoclast differentiation
Source: PeerJ. 2023 Mar 3;11:e15041. doi: 10.7717/peerj.15041 (PMC9987298; doi:10.7717/peerj.15041)
Supplement: Supplemental Information 2 [file peerj-11-15041-s002.xlsx]

## Sheet: BGN
sample	target	Ct mean	△ Ct mean	2^(-△ Ct)	2^(-△ △ Ct)
WT1	BGN	23.5037	5.70865	0.0191216	0.992407			con2^(-△ Ct)mean	0.0192679
	GAPDH	17.795
WT2	BGN	25.3853	5.63853	0.020074	1.04184
	GAPDH	19.7468
WT3	BGN	24.1784	5.74792	0.0186081	0.965757
	GAPDH	18.4305
KO1	BGN	24.9137	5.20795	0.0270553	1.40416
	GAPDH	19.7057
KO2	BGN	26.1176	5.12227	0.0287106	1.49008
	GAPDH	20.9953
KO3	BGN	25.2498	5.17142	0.0277489	1.44016
	GAPDH	20.0784

## Sheet: COL1A2
sample	target	Ct mean	△ Ct mean	2^(-△ Ct)	2^(-△ △ Ct)
WT1	COL1A2	24.9755	7.18049	0.00689376	1.21284			con2^(-△ Ct)mean	0.00568397
	GAPDH	17.795
WT2	COL1A2	27.3165	7.56976	0.0052635	0.926026
	GAPDH	19.7468
WT3	COL1A2	26.1051	7.67458	0.00489464	0.86113
	GAPDH	18.4305
KO1	COL1A2	26.3415	6.63578	0.0100561	1.76921
	GAPDH	19.7057
KO2	COL1A2	27.8277	6.83241	0.00877487	1.54379
	GAPDH	20.9953
KO3	COL1A2	26.6782	6.59983	0.0103099	1.81385
	GAPDH	20.0784

## Sheet: GM20708
sample	target	Ct mean	△ Ct mean	2^(-△ Ct)	2^(-△ △ Ct)
WT1	GM20708	30.4448	12.6498	0.000155609	0.856672			con2^(-△ Ct)mean	0.000181644
	GAPDH	17.795
WT2	GM20708	31.6659	11.9192	0.000258208	1.42151
	GAPDH	19.7468
WT3	GM20708	31.3274	12.8969	0.000131115	0.721822
	GAPDH	18.4305
KO1	GM20708	30.0458	10.3401	0.000771466	4.24714
	GAPDH	19.7057
KO2	GM20708	30.8618	9.86648	0.00107125	5.89756
	GAPDH	20.9953
KO3	GM20708	29.9834	9.90503	0.00104301	5.74207
	GAPDH	20.0784

## Sheet: SPARC
sample	target	Ct mean	△ Ct mean	2^(-△ Ct)	2^(-△ △ Ct)
WT1	SPARC	24.1582	6.36319	0.0121476	1.12996			con2^(-△ Ct)mean	0.0107504
	GAPDH	17.795
WT2	SPARC	26.6783	6.93156	0.00819206	0.762021
	GAPDH	19.7468
WT3	SPARC	24.822	6.39148	0.0119117	1.10802
	GAPDH	18.4305
KO1	SPARC	25.3796	5.67388	0.0195881	1.82207
	GAPDH	19.7057
KO2	SPARC	26.8301	5.83479	0.0175208	1.62977
	GAPDH	20.9953
KO3	SPARC	25.8101	5.73169	0.0188187	1.75051
	GAPDH	20.0784

## Sheet: CYP27A1
sample	target	Ct mean	△ Ct mean	2^(-△ Ct)	2^(-△ △ Ct)
WT1	CYP27A1	23.5951	6.14907	0.0140911	1.14651			con2^(-△ Ct)mean	0.0122905
	GAPDH	17.446
WT2	CYP27A1	29.7413	6.96873	0.00798368	0.649582
	GAPDH	22.7726
WT3	CYP27A1	28.9352	6.07859	0.0147966	1.20391
	GAPDH	22.8567
KO1	CYP27A1	25.2027	8.65509	0.00248061	0.201832
	GAPDH	16.5477
KO2	CYP27A1	28.4645	8.483	0.00279488	0.227402
	GAPDH	19.9815
KO3	CYP27A1	29.7654	8.82101	0.00221111	0.179904
	GAPDH	20.9444

## Sheet: ELANE
sample	target	Ct mean	△ Ct mean	2^(-△ Ct)	2^(-△ △ Ct)
WT1	ELANE	20.3721	2.92607	0.131572	1.07999			con2^(-△ Ct)mean	0.121827
	GAPDH	17.446
WT2	ELANE	25.9125	3.1399	0.113448	0.931218
	GAPDH	22.7726
WT3	ELANE	25.91	3.05335	0.120462	0.988792
	GAPDH	22.8567
KO1	ELANE	20.013	3.46535	0.0905371	0.743159
	GAPDH	16.5477
KO2	ELANE	23.4954	3.5139	0.0875406	0.718562
	GAPDH	19.9815
KO3	ELANE	24.2186	3.27423	0.103361	0.848423
	GAPDH	20.9444

## Sheet: LY6C2
sample	target	Ct mean	△ Ct mean	2^(-△ Ct)	2^(-△ △ Ct)
WT1	LY6C2	21.1481	3.70204	0.0768378	0.906756			con2^(-△ Ct)mean	0.0847392
	GAPDH	17.446
WT2	LY6C2	26.385	3.61235	0.0817661	0.964915
	GAPDH	22.7726
WT3	LY6C2	26.2433	3.38664	0.0956137	1.12833
	GAPDH	22.8567
KO1	LY6C2	21.3313	4.78364	0.0363062	0.428446
	GAPDH	16.5477
KO2	LY6C2	24.5621	4.58059	0.0417931	0.493197
	GAPDH	19.9815
KO3	ELANE	25.2372	4.29276	0.0510213	0.602098
	GAPDH	20.9444

## Sheet: S100A9
sample	target	Ct mean	△ Ct mean	2^(-△ Ct)	2^(-△ △ Ct)
WT1	S100A9	17.9023	0.456225	0.728891	0.897372			con2^(-△ Ct)mean	0.81225
	GAPDH	17.446
WT2	S100A9	22.7214	-0.0512251	1.03614	1.27565
	GAPDH	22.7726
WT3	S100A9	23.4307	0.574077	0.671716	0.826981
	GAPDH	22.8567
KO1	S100A9	17.6932	1.14558	0.452008	0.556489
	GAPDH	16.5477
KO2	S100A9	21.2026	1.2211	0.428954	0.528106
	GAPDH	19.9815
KO3	S100A9	22.0076	1.06322	0.478564	0.589183
	GAPDH	20.9444
